# Supplementary material
Source: publisher figshare collection journal article supplement (https://tandf.figshare.com/articles/dataset/_/11628162)
Supplement: Supplementary file 1 [file 1]

For how long could Warren Buffet pay the tuition of all San José State Students?

Name: \_\_\_\_\_

SID: \_\_\_\_\_

Name: \_\_\_\_\_

SID: \_\_\_\_\_

Name: \_\_\_\_\_

SID: \_\_\_\_\_

Math 1 Spring 2019  
Test 1 Assessment Rubric

|                      | <b>Strong<br/>(4-5 points)</b>                                                                                                                                                                           | <b>Developing<br/>(2-3 points)</b>                                                                                                                                               | <b>Needs Work<br/>(0-1 point)</b>                                                                                                                                              |
|----------------------|----------------------------------------------------------------------------------------------------------------------------------------------------------------------------------------------------------|----------------------------------------------------------------------------------------------------------------------------------------------------------------------------------|--------------------------------------------------------------------------------------------------------------------------------------------------------------------------------|
| Mathematical Content | <ul style="list-style-type: none"> <li>Supporting calculations are all presented.</li> <li>Calculations are correct.</li> </ul>                                                                          | <ul style="list-style-type: none"> <li>There are some supporting calculations.</li> <li>Calculations are somewhat correct.</li> </ul>                                            | <ul style="list-style-type: none"> <li>There are few supporting calculations.</li> <li>If there are supporting calculations, they are mostly not correct.</li> </ul>           |
| Written Content      | <ul style="list-style-type: none"> <li>All assumptions and reasonings are stated.</li> <li>The writing tells the whole story of how the answer was reached and the story is easy to navigate.</li> </ul> | <ul style="list-style-type: none"> <li>Some assumptions and reasonings are missing.</li> <li>The story is not quite complete and/or is somewhat difficult to navigate</li> </ul> | <ul style="list-style-type: none"> <li>Little or no evidence of assumptions or reasonings.</li> <li>The story is largely missing and/or very difficult to navigate.</li> </ul> |

Comments:

Total Score for Part B: \_\_\_\_\_ out of 10 points
