# Supplementary material
Source: publisher figshare collection journal article supplement (https://tandf.figshare.com/articles/dataset/_/11628162)
Supplement: Supplementary file 2 [file 1]

How long would it take you to pay off your share of the Federal Government of the United States of America's debt?

Math 1 Spring 2018  
Test 1 Assessment Rubric

|                      | <b>Strong<br/>(4-5 points)</b>                                                                                                                                                                        | <b>Developing<br/>(2-3 points)</b>                                                                                                                                            | <b>Needs Work<br/>(0-1 point)</b>                                                                                                                                           |
|----------------------|-------------------------------------------------------------------------------------------------------------------------------------------------------------------------------------------------------|-------------------------------------------------------------------------------------------------------------------------------------------------------------------------------|-----------------------------------------------------------------------------------------------------------------------------------------------------------------------------|
| Mathematical Content | <ul style="list-style-type: none"><li>Supporting calculations are all presented.</li><li>Calculations are correct.</li></ul>                                                                          | <ul style="list-style-type: none"><li>There are some supporting calculations.</li><li>Calculations are somewhat correct.</li></ul>                                            | <ul style="list-style-type: none"><li>There are few supporting calculations.</li><li>If there are supporting calculations, they are mostly not correct.</li></ul>           |
| Written Content      | <ul style="list-style-type: none"><li>All assumptions and reasonings are stated.</li><li>The writing tells the whole story of how the answer was reached and the story is easy to navigate.</li></ul> | <ul style="list-style-type: none"><li>Some assumptions and reasonings are missing.</li><li>The story is not quite complete and/or is somewhat difficult to navigate</li></ul> | <ul style="list-style-type: none"><li>Little or no evidence of assumptions or reasonings.</li><li>The story is largely missing and/or very difficult to navigate.</li></ul> |

Comments:

Total Score for Part A: \_\_\_\_\_ out of 10 points
