# Supplementary material
Source: publisher figshare collection journal article supplement (https://tandf.figshare.com/articles/dataset/_/11628162)
Supplement: Supplementary file 6 [file 1]

1. Short answer

(a) What is the solution to  $ay'' + by' + cy + d = 0$ , where  $a, b, c$ , &  $d$  are real numbers with  $b^2 = 4ac$ ? [2pts]

(b) Create an IVP with solution  $y(t) = e^t + e^{2t} + e^{3t}$  (hint: think second-order linear). [2pts]

2. True/False (circle one for each) [1pt each]

(a)  $y(x) = 1/x$  is a solution to  $x^2y'' + 3xy' + y = 0$ . T / F

(b) The spring-mass system described by  $mx'' + cx' + kx = 0$  oscillates for all values of  $m, c, k > 0$ . T / F

(c)  $y(t) = \sum_{n=0}^{\infty} \frac{t^n}{n!}$  is a solution to  $y'' - y = 0$  T / F

(d) The particular solution to  $y'' + 3y' + 2y = \cos(t)$  is of the form  $y_p(t) = A \cos(t)$  T / F

3. Second-order linear ordinary differential equations.

(a) Solve  $y'' - y = e^{-t}$ . [5pts]

(b) Find the solution to the corresponding homogeneous equation of the above using power series methods. [4pts]

#### 4. Laplace Transforms

Solve the following IVP using Laplace transform methods. [5 pt]

$$y'' + 3y' + 2y = \sin(t), \quad y(0) = 0, \quad y'(0) = 0$$

## 5. Application

- (a) Suppose you have a spring-mass system, where the mass is  $1\text{ kg}$ , the spring constant is  $k = 5$  and the drag coefficient – which acts proportional to the velocity of the mass – is  $\mu = 2$ . Derive a differential equation for this system.  
[2pts]

- (b) Solve the differential equation with the initial conditions  $y(0) = 1$ , and  $y'(0) = 0$ .  
[2pts]

- (c) Now suppose I improve the spring-mass system by eliminating drag entirely. I also now apply a periodic force to this system of constant amplitude. What would the amplitude and frequency of this force need to be for the spring/mass system to experience resonance? (Resonance, in this context, is defined as a solution  $y_r(t)$  to the ODE model of this system that becomes unbounded; ie.  $\lim_{t \rightarrow \infty} y_r(t) = \infty$ ). If you couldn't solve (a) and (b) above, use the IVP

$$y'' + 5y = f(t), \quad y(0) = 1, \quad y'(0) = 0,$$

where  $f(t)$  is the forcing term. [2pts]

- (d) If we re-introduce the drag force, as in the original setup, and still apply a periodic force of constant amplitude, can the spring-mass system ever experience the unbounded resonance you found in part (c)? What is the long-term behaviour of this system? [2pt]

(Blank page for calculations)
